# Supplementary material for: F-waves of peroneal and tibial nerves in the differential diagnosis and follow-up evaluation of L5 and S1 radiculopathies
Source: Springer Nature journal article supplement (doi:10.1007/s00586-018-5650-9), 2018-06-12
Supplement: MOESM1 [file 15839266]

| **Supplementary Table 1:** Nerve conduction study measurements in both radiculopathy patient groups | | | | | | | | |
| --- | --- | --- | --- | --- | --- | --- | --- | --- |
|  | L5 patient group | | | | S1 patient group | | | |
|  | Motor nerve | | Sensory nerve | | Motor nerve | | Sensory nerve | |
|  | Involved side | Normal side | Involved side | Normal side | Involved side | Normal side | Involved side | Normal side |
| peroneal nerve DL (ms) | 4.2 ± 0.7 | 4.1 ± 0.6 | 2.8 ± 0.4 | 2.8 ± 0.3 | 4.2 ± 0.6 | 4.2 ± 0.6 | 2.9 ± 0.3 | 2.8 ± 0.3 |
| peroneal nerve AMP (mV, μV) | 5.7 ± 2.3 | 5.9 ± 2.0 | 18.8 ± 5.9 | 19.1 ± 6.1 | 5.7 ± 1.8 | 5.7 ± 1.8 | 18.5 ± 6.0 | 18.7 ± 6.1 |
| peroneal nerve NCV (m/s) | 48.5 ± 6.3# | 48.0 ± 5.4# | 53.1 ± 5.4 | 51.9 ± 5.8 | 48.2 ± 5.8# | 48.4 ± 6.1# | 52.6 ± 5.7 | 52.0 ± 6.0 |
|  | 51.1 ± 7.3$ | 51.5 ± 6.9$ | / | / | 51.0 ± 7.0$ | 51.1 ± 6.9$ | / | / |
| Tibial nerve DL (ms) | 4.5 ± 0.6 | 4.4 ± 0.5 | 2.6 ± 0.4 | 2.6 ± 0.5 | 4.4 ± 0.5 | 4.4 ± 0.5 | 2.6 ± 0.4 | 2.6 ± 0.4 |
| Tibial nerve AMP (mV, μV) | 12.7 ± 4.6 | 12.5 ± 4.7 | 14.7 ± 10.2 | 14.8 ± 10.4 | 12.3 ± 4.7 | 12.4 ± 4.5 | 14.9 ± 11.0 | 14.8 ± 10.8 |
| Tibial nerve NCV (m/s) | 47.8 ± 5.1 | 48.1 ± 4.9 | 54.8 ± 8.0 | 55.1 ± 7.9 | 48.0 ± 5.0 | 48.1 ± 5.0 | 55.0 ± 7.5 | 54.9 ± 7.7 |
| Sural nerve DL (ms) | / | / | 3.4 ± 0.3 | 3.5 ± 0.4 | / | / | 3.5 ± 0.4 | 3.5 ± 0.4 |
| Sural nerve AMP (μV) | / | / | 20.1 ± 7.5 | 19.9 ± 7.7 | / | / | 20.4 ± 8.0 | 20.3 ± 7.8 |
| Sural nerve NCV (m/s) | / | / | 51.0 ± 4.0 | 51.2 ± 3.9 | / | / | 51.6 ± 3.8 | 51.3 ± 3.9 |
| Peroneal nerve studies included deep peroneal motor conduction studies and superficial peroneal sensory conduction studies.  (mV, μV): millivolt for the motor nerve study, microvolt for the sensory nerve study  #: motor conduction velocity of the peroneal nerve to stimulation below the fibular head and the anterior ankle  $: motor conduction velocity of the peroneal nerve to stimulation at the lateral popliteal fossa and the anterior ankle  DL: onset-latency for motor nerve study, peak latency for sensory nerve study; AMP: peak-to-peak amplitude for sensory nerve study, baseline-to-peak amplitude for motor nerve study; NCV: nerve conduction velocity | | | | | | | | |
