# Supplementary material for: F-waves of peroneal and tibial nerves in the differential diagnosis and follow-up evaluation of L5 and S1 radiculopathies
Source: Springer Nature journal article supplement (doi:10.1007/s00586-018-5650-9), 2018-06-12
Supplement: MOESM2 [file 15839266]

| **Supplementary Table 2:** Needle EMG findings on the involved side of both radiculopathy patient groups | | | | |
| --- | --- | --- | --- | --- |
|  | L5 radiculopathy group | | S1 radiculopathy group | |
|  | Spontaneous activity | Changes in MUAP | Spontaneous activity | Changes in MUAP |
| Paraspinal muscle | 29/67 | / | 23/67 | / |
| Anterior tibialis | 46/67 | 56/67 | / | / |
| Peroneus longus | 38/67 | 49/67 | / | / |
| Extensor digitorum brevis | 49/67 | 56/67 | / | / |
| Lateral gastrocnemius | / | / | 38/75 | 66/75 |
| abductor hallucis | / | / | 35/75 | 52/75 |
| biceps femoris | / | / | 38/75 | 46/75 |
| Soleus | / | / | 33/75 | 44/75 |
| A/B: where A is the number of limbs that had abnormal spontaneous activity and/or changes in MUAP, and B is the number of limbs that underwent needle EMG evaluation.  /: the tested muscles without abnormal spontaneous activity and/or changes in MUAP  Spontaneous activity: fibrillation potentials and/or positive sharp waves  Changes in MUAP: increase duration and/or amplitudes;  EMG: Electromyogram; MUAP: Motor unit action potential | | | | |
