# Supplementary material for: F-waves of peroneal and tibial nerves in the differential diagnosis and follow-up evaluation of L5 and S1 radiculopathies
Source: Springer Nature journal article supplement (doi:10.1007/s00586-018-5650-9), 2018-06-12
Supplement: MOESM4 [file 15839266]

| **Supplementary Table 4:** Surgical treatment follow-up measurements of tibial F-waves, M-wave, ODI and MRC in S1 radiculopathy group. | | | | | | | |
| --- | --- | --- | --- | --- | --- | --- | --- |
|  | **Initial test** | | | **Follow-up test** | | | |
| **ODI scores** | 43.7 ± 17.0* | | | 18.6 ± 7.0* | | | |
| **MRC scales** | 4.7 ± 0.5 | | | 4.7 ± 0.5 | | | |
|  | **Involved side** | **Normal side** | | **Involved side** | | | **Normal side** |
| **Tibial M-wave** | | | | | | | |
| Onset latency (ms) | 4.1 ± 0.4 | 4.1 ± 0.4 | | 4.1 ± 0.4 | | | 4.1 ± 0.4 |
| Amplitude (mV) | 13.8 ± 4.8 | 14.4 ± 5.1 | | 13.8 ± 4.7 | | | 14.5 ± 5.0 |
| **Tibial F-wave** | | | | | | | |
| Minimal latency (ms/m) | 27.7 ± 2.7 | 26.4 ± 1.4 | | 27.4 ± 2.7 | | | 26.5 ± 1.5 |
| Chronodispersion (ms) | 4.5 ± 1.8 | 3.5 ± 1.3 | | 4.5 ± 1.8 | | | 3.5 ± 1.1 |
| Persistence (%) | 96.1 ± 7.1 | 100.0 ± 0.0 | | 94.3 ± 8.1 | | | 97.9 ± 3.8 |
| Mean duration (ms) | 14.4 ± 3.3 | 12.0 ± 2.3 | | 14.3 ± 3.2 | | | 12.0 ± 2.3 |
| F/M ratio | 3.63 ± 2.00 | 2.57 ± 1.35 | | 3.68 ± 2.21 | | | 2.61 ± 1.32 |
| Repeater F-wave (%) | 15 | 10 | | 15 | | | / |
| Cases with repeater waves | 1 | 1 | | 1 | | | / |
|  | **Side-to-side difference** | | | | | | |
| **Tibial M-wave** | | | | | | | |
| Onset latency (ms) | 0.4 ± 0.3 | | | 0.5 ± 0.4 | | | |
| Amplitude (mV) | 1.2 ± 1.0 | | | 1.3 ± 1.1 | | | |
| **Tibial F-wave** | | | | | | | |
| Minimal latency (ms/m) | 2.3 ± 1.9 | | | 1.9 ± 1.7 | | | |
| Chronodispersion (ms) | 1.3 ± 1.5 | | | 1.3 ± 1.4 | | | |
| Persistence (%) | 3.9 ± 7.1 | | | 5.7 ± 7.8 | | | |
| Mean duration (ms) | 2.9 ± 1.5 | | | 2.8 ± 1.4 | | | |
| F/M ratio | 1.47 ± 1.80 | | | 1.62 ± 2.02 | | | |
|  |  | | |  | | | |
| **Needle EMG** | | | | | | | |
| Spontaneous activity | 5/14 | | / | | 0/14 | / | |
| Changes in MUAPs | 2/14 | | / | | 13/14 | / | |
| Both | 7/14 | | / | | 1/14 | / | |
| **MRC:** Medical Research Council; **ODI:** Oswestry Disability Index; **EMG:** Electromyography; **MUAP:** Motor unit action potential  **a/b:** a is the number of patients who had abnormal needle EMG and B is the number of patients underwent needle EMG evaluation.  **Both:** the patients had both spontaneous activity and changes in MUAP in the muscles that were innervated by the involved S1 root.  **/:** no repeater F-wave or abnormal needle EMG  ***:** P-values less than 0.05 between the initial and follow-up tests. | | | | | | | |
